# Supplementary material
Source: HighWire-hosted journal article supplement (http://qualitysafety.bmj.com/highwire/filestream/162951/field_highwire_adjunct_files/2/bmjqs-2022-015538supp003_data_supplement.pdf)

### SUPPLEMENTAL MATERIAL 3. FLOWCHART OF THE QUESTIONS REGARDING INFORMED CONSENT

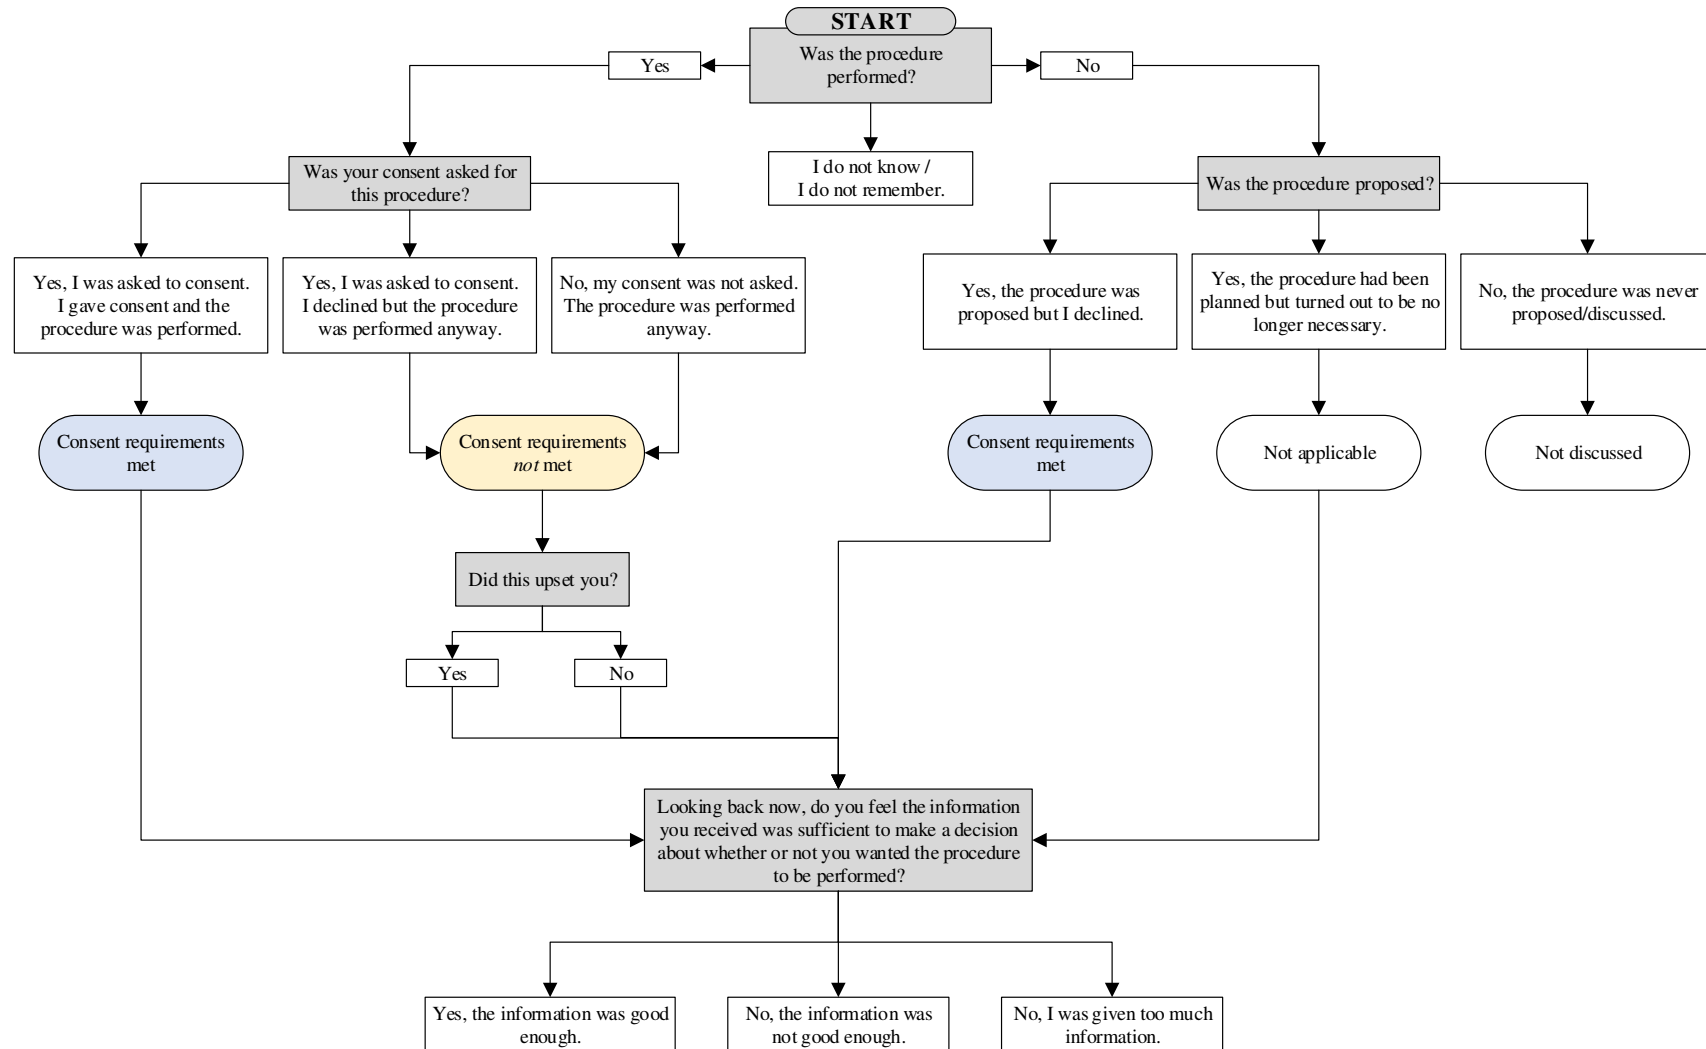

Supplement: bmjqs-2022-015538supp003_data_supplement.pdf [file bmjqs-2022-015538supp003_data_supplement.pdf]
